# Supplementary material for: Unraveling the Biosynthesis of Carvacrol in Different Tissues of Origanum vulgare
Source: MDPI journal article supplement (doi:10.3390/ijms232113231), 2022-10-30
Supplement: s1 [file s1]

## Appendix

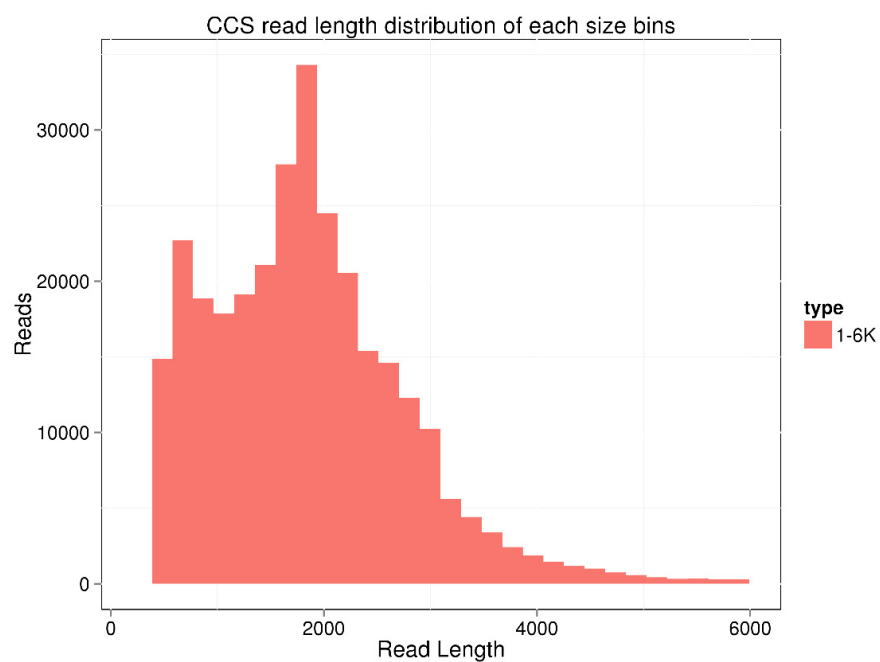

**Figure S1.** Circular consensus read length distribution of *Origanum vulgare* 'Hot & Spicy'.

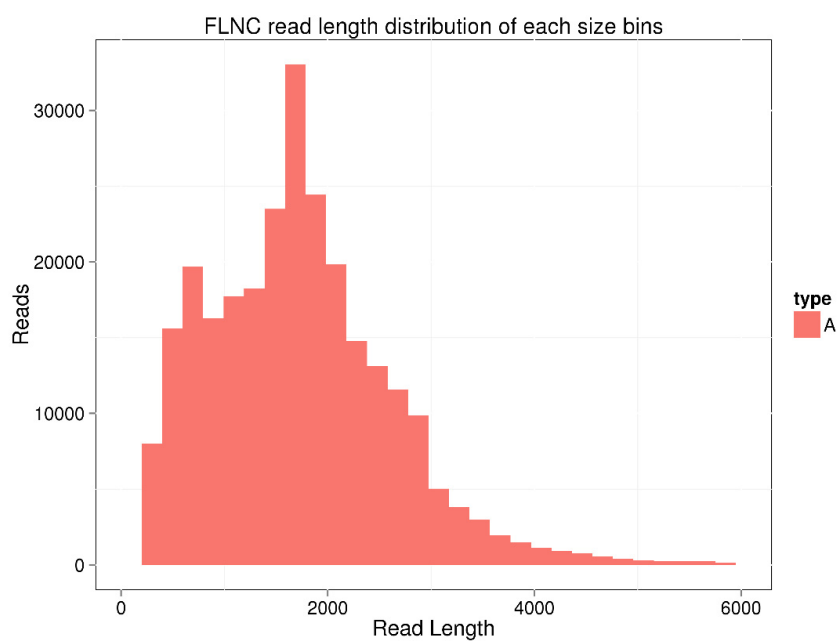

**Figure S2.** Full-length non-chimeric read length distribution of *Origanum vulgare* 'Hot & Spicy'.

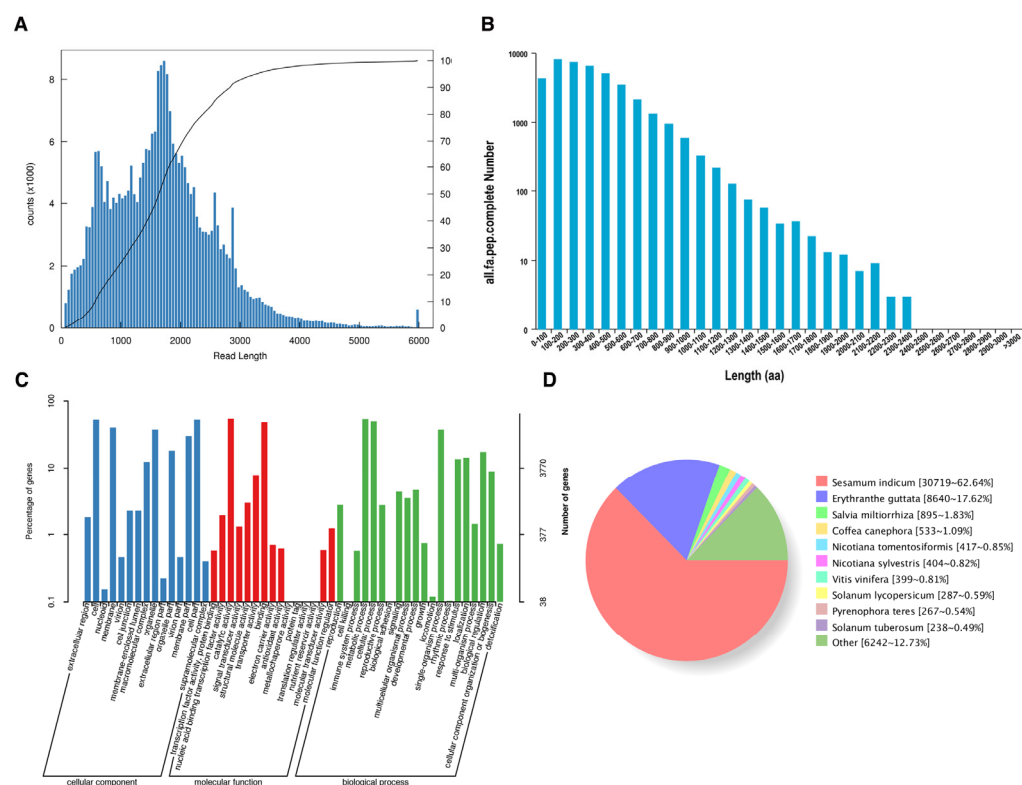

**Figure S3.** The full-length transcriptome sequencing and assembly of *Origanum vulgare* 'Hot & Spicy' using the SMRT method. (A) Length distribution of full length non-chimeric (FLNC) sequences. (B) Length distribution of predicated protein sequences. (C) Functional annotation of FLNC sequences based on GO categorization. The main functional categories within the biological process, cellular component and molecular function categories are relevant to plant physiology. The right y-axis indicates the number of FLNC sequences. The left y-axis indicates the percentage of FLNC sequences. (D) NR classification diagram.

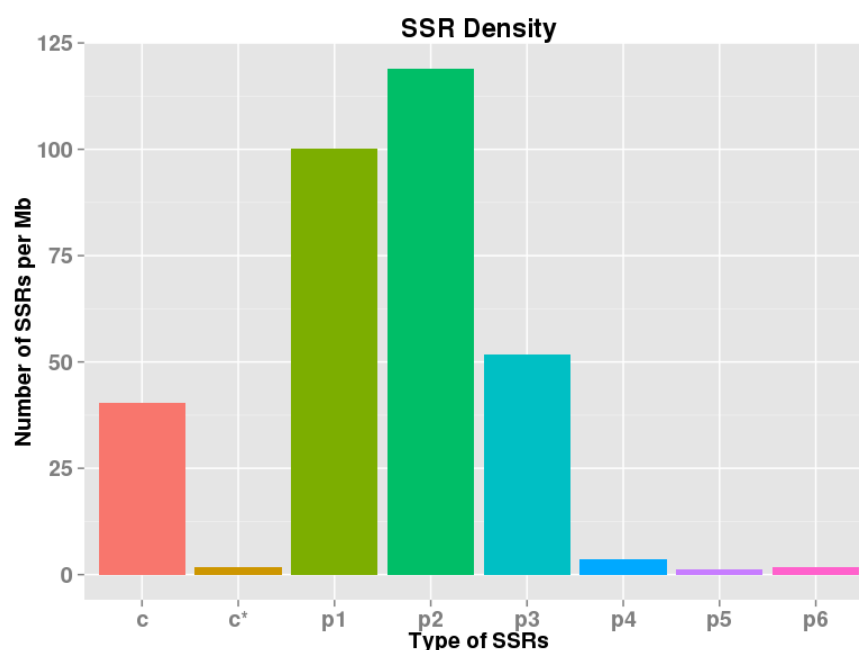

**Figure S4.** SSR density distribution of *Origanum vulgare* 'Hot & Spicy'.

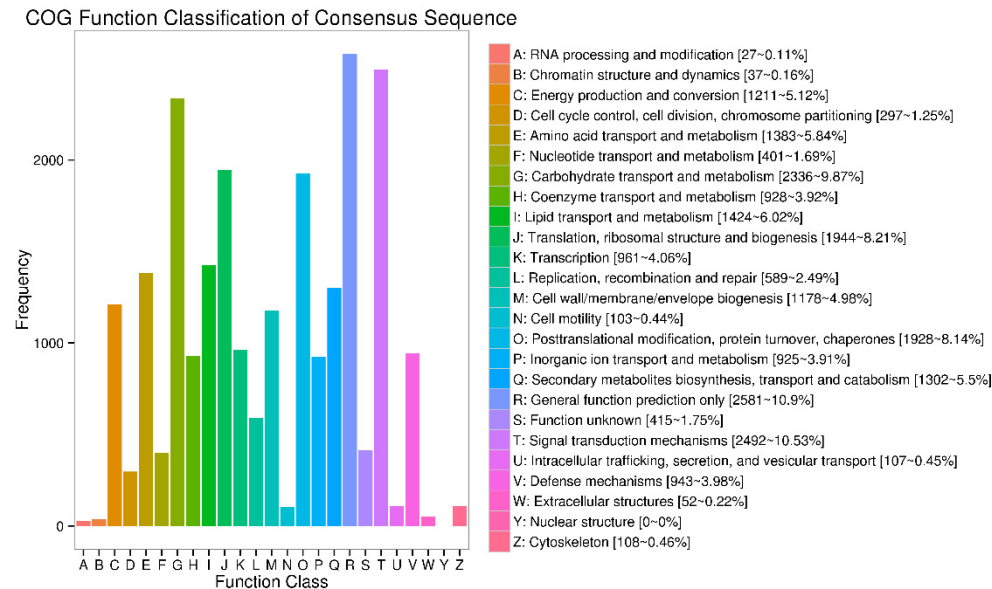

Figure S5. COG function classification of consensus sequences of *Origanum vulgare* ‘Hot & Spicy’.

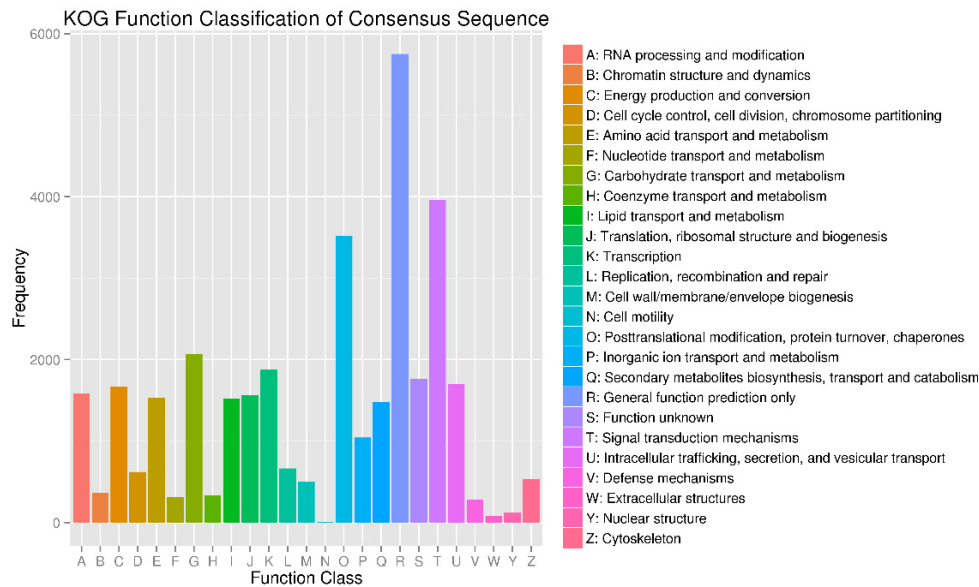

Figure S6. KOG function classification of consensus sequences of *Origanum vulgare* ‘Hot & Spicy’.

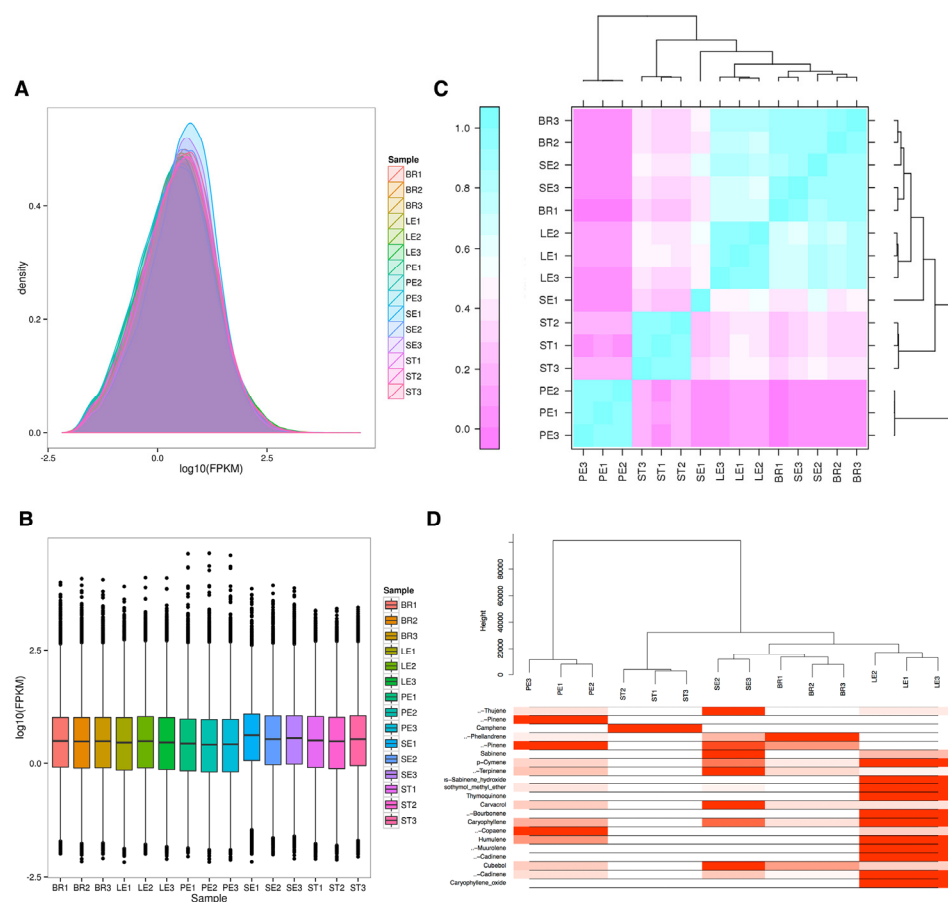

**Figure S7.** Next generation sequencing data analysis of *Origanum vulgare* 'Hot & Spicy' using stem (ST; ST1-3), leaf (LE; LE1-3), bract (BR; BR1-3), sepal (SE; SE1-3) and petal (PE; PE1-3) samples. (A) Comparison diagram of FPKM density distribution. (B) Boxplot of FPKM average values. (C) Pearson Correlation Coefficient analysis of expression levels. (D) Pearson Correlation Coefficient.

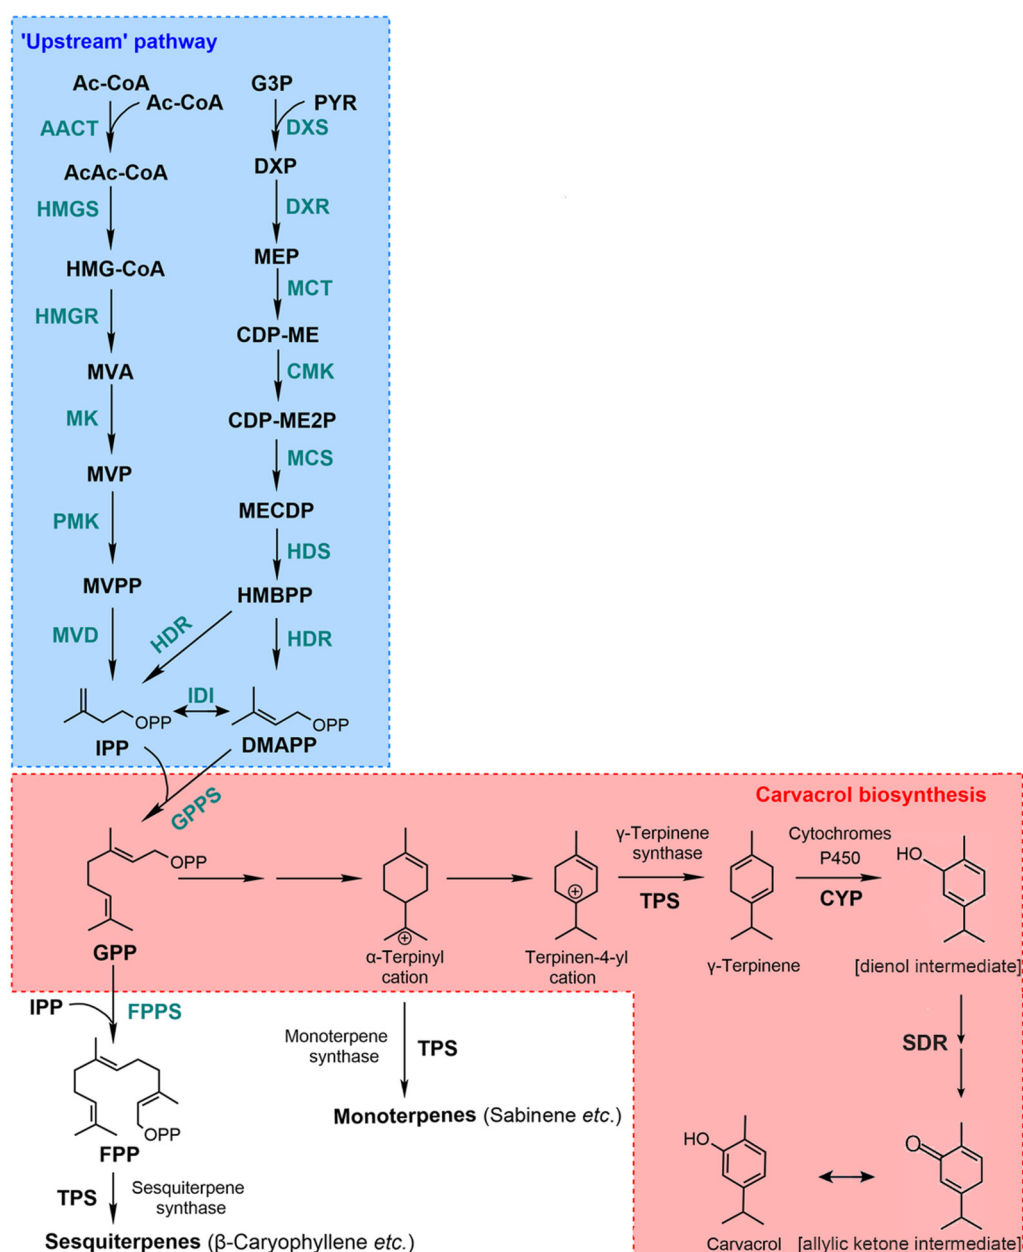

**Figure S8.** Putative schematic representation of the monoterpene/sesquiterpene biosynthetic pathways in *O. vulgare* 'HS'. The main pathway refers to the carvacrol biosynthesis, which originates from 'upstream' pathways of MVA and MEP pathways. Abbreviations: AACT, acetoacetyl-CoA thiolase; Ac-CoA, acetyl-coenzyme A; AcAc-CoA, acetoacetyl-coenzyme A; CMK, CDP-ME kinase; CDP-ME, 4-diphosphocytidyl-2-C-methyl-D-erythritol; CYP, Cytochromes P450; DMAPP, dimethylallyl diphosphate; DXP, 1-deoxy-D-xylulose-5-phosphate; DXR, DXP reductoisomerase; DXS, DXP synthase; FPP, farnesyl diphosphate; FPPS, FPP synthase; G3P, glyceraldehyde 3-phosphate; GPP, geranyl diphosphate; GPPS, GPP synthase; HDR, HMBPP reductase; HDS, HMBPP synthase; HMBPP, 1-hydroxy-2-methyl-2-(E)-butenyl 4-diphosphate; HMG-CoA, hydroxymethylglutaryl-coenzyme A; HMGR, HMG-CoA reductase; HMGS, HMG-CoA synthase; IDI, isopentenyl diphosphate isomerase; IPP, isopentenyl diphosphate; MCS, MECDP synthase; MCT, MEP cytidyltransferase; MECDP, 2-C-methyl-D-erythritol 2,4-cyclodiphosphate; MEP, 2-C-methyl-D-erythritol-4-phosphate; MK, mevalonate kinase; MVA, mevalonate; MVD, mevalonate diphosphate decarboxylase; MVP, 5-phosphomevalonate; MVPP, 5-diphosphomevalonate; PMK, phosphomevalonate kinase; PYR, pyruvate; TPS, terpene synthase.

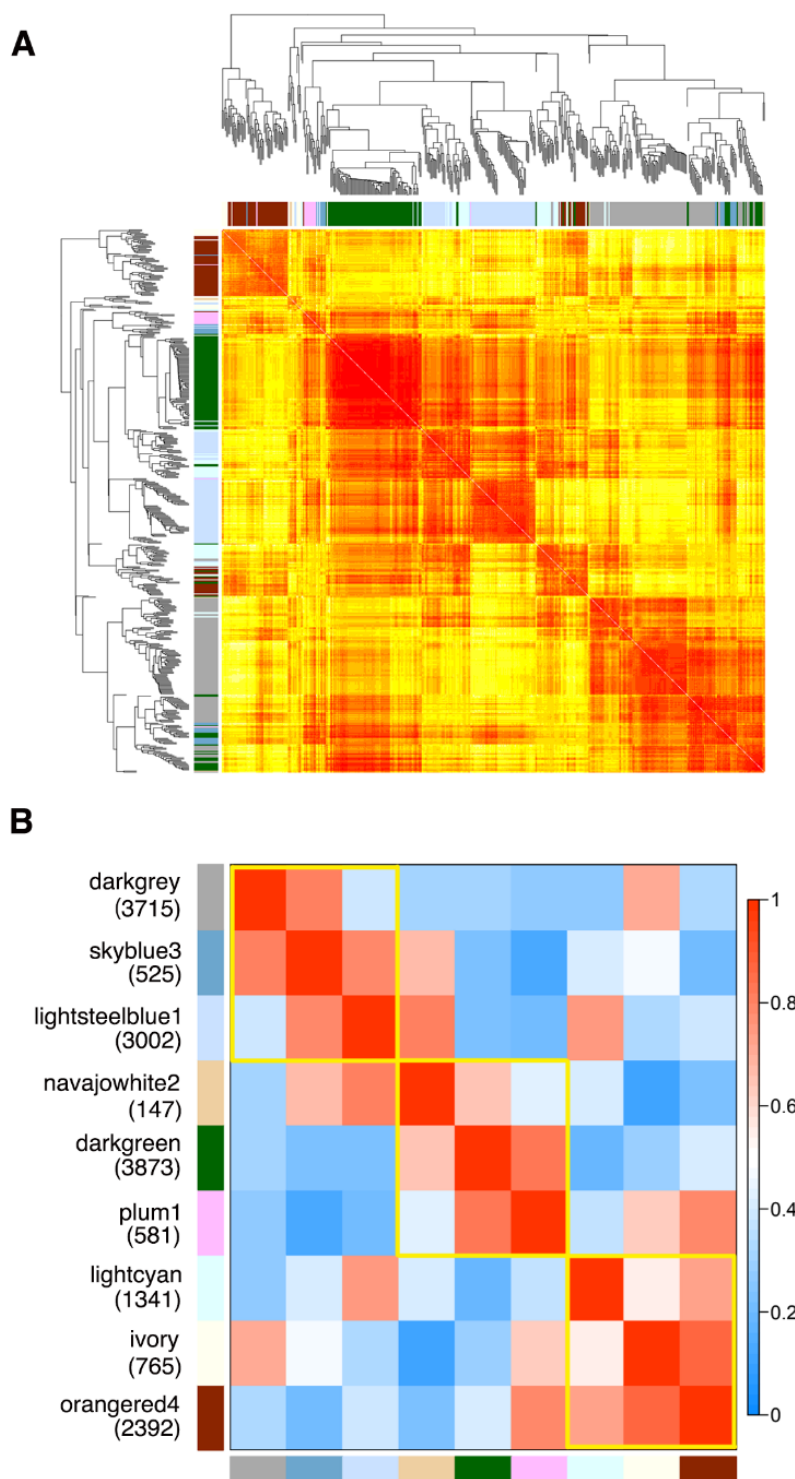

**Figure S9.** Identification of co-expression network modules in *Origanum vulgare* 'Hot & Spicy'. (A) Network heat map plot. Branches in the hierarchical clustering dendrograms correspond to modules. Color-coded module membership is indicated by the colored bars below and to the right of the dendrograms. In the heat map, high co-expression interconnectedness is indicated by progressively more saturated yellow and red colors. Modules correspond to blocks of highly interconnected genes. Genes with high intramodular connectivity are located at the tip of the module branches because they display the highest interconnectedness with the rest of the genes in the module. (B) Module eigengene adjacency heat map. The heat map shows the relatedness of the nine co-expression modules identified in WGCNA, with red indicating highly related and blue indicating not related.

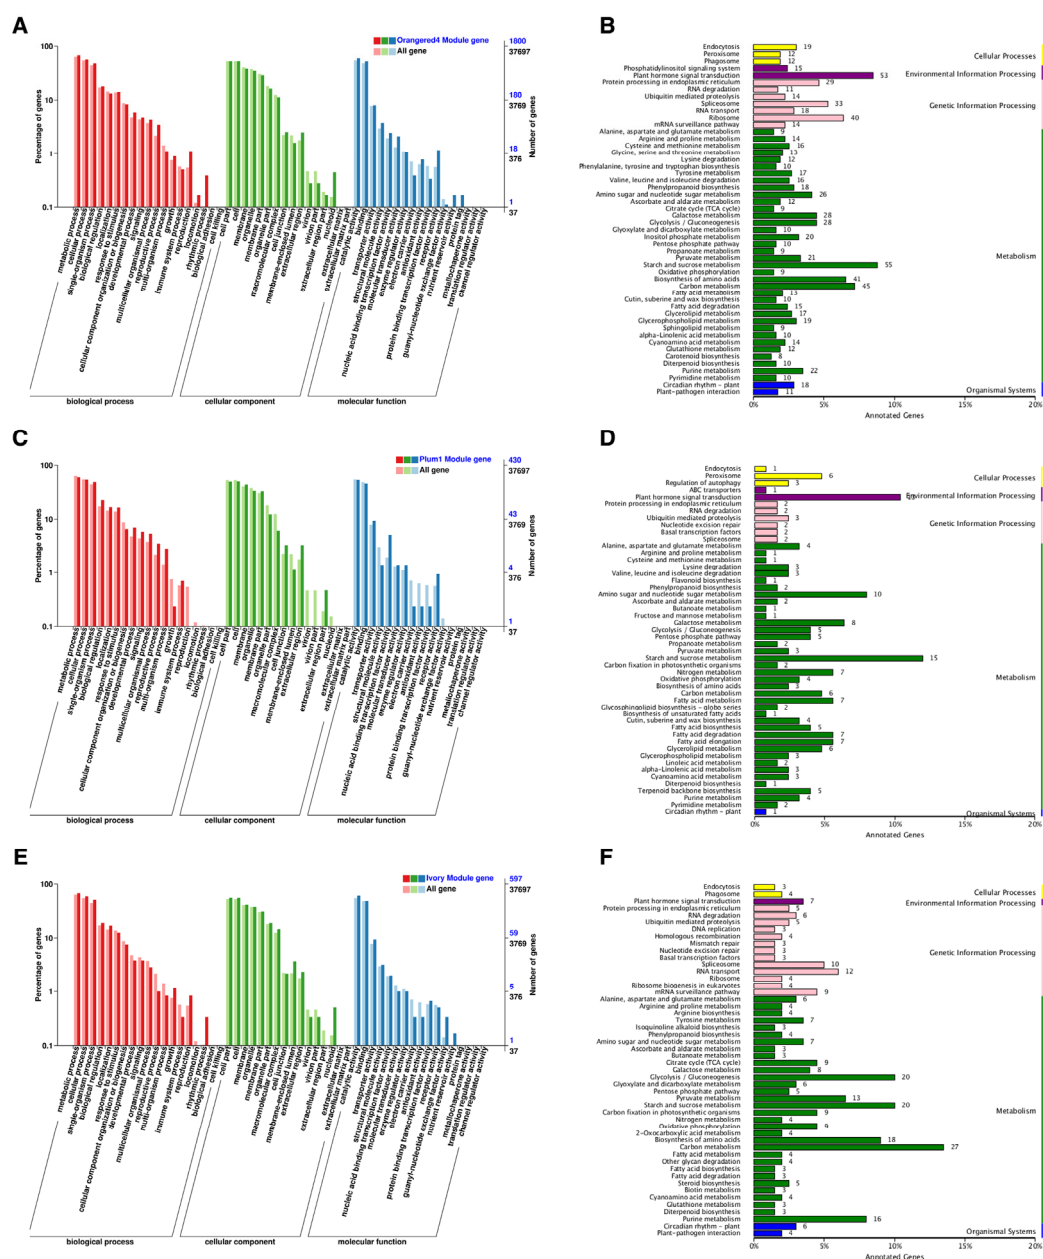

**Figure S10.** Enrichment analysis of GO terms and KEGG terms in *Origanum vulgare* 'Hot & Spicy'. Functional annotation of genes based on GO categorization (A,C,E) and KEGG categorization (B,D,F) in orangered4, plum1 and ivory modules positive to carvacrol content. The bars represent the percentage and numbers of genes with BLASTX matches to each GO and KEGG term.

**Table S1.** Relative percentage of all VOCs in different tissues of *Origanum vulgare* 'Hot & Spicy' via SPME-GC/MS.

| Compound                    | RI   | Relative percentage of all volatile compounds (%) |            |            |            |            |
|-----------------------------|------|---------------------------------------------------|------------|------------|------------|------------|
|                             |      | Stem                                              | Leaf       | Bract      | Sepal      | Petal      |
| $\alpha$ -Thujene           | 923  | -                                                 | 0.23±0.20  | -          | 0.36±0.12  | 0.23±0.2   |
| $\alpha$ -Pinene            | 928  | 0.74±0.64                                         | -          | -          | -          | 0.06±0.05  |
| Camphene                    | 942  | 0.60±0.52                                         | -          | -          | -          | -          |
| $\beta$ -Pinene             | 970  | 0.16±0.14                                         | -          | 0.11±0.11  | 0.03±0.03  | 0.14±0.13  |
| Sabinene                    | 971  | -                                                 | 0.09±0.03  | -          | 0.05±0.01  | -          |
| $\alpha$ -Phellandrene      | 992  | 0.94±0.17                                         | -          | 0.37±0.33  | 0.02±0.02  | 0.02±0.02  |
| p-Cymene                    | 1022 | 65.44±5.77                                        | 5.58±0.82  | 0.81±0.80  | 0.67±0.28  | 0.91±0.24  |
| $\gamma$ -Terpinene         | 1056 | -                                                 | 0.28±0.31  | 0.81±0.15  | 0.68±0.20  | 0.82±0.14  |
| cis-Sabinene hy-<br>droxide | 1065 | -                                                 | 0.05±0.06  | -          | -          | -          |
| Carvacrol me-<br>thyl ether | 1245 | 8.46±1.52                                         | 0.70±0.16  | -          | 0.01±0.01  | 0.07±0.01  |
| Thymoquinone                | 1249 | -                                                 | 0.96±0.82  | -          | -          | -          |
| Carvacrol                   | 1302 | 13.06±6.74                                        | 84.71±1.59 | 96.07±0.67 | 96.92±0.85 | 94.40±1.23 |
| $\beta$ -Bourbonene         | 1379 | 0.57±0.07                                         | 0.32±0.04  | -          | -          | -          |
| $\beta$ -Caryophyllene      | 1413 | 2.64±0.50                                         | 3.33±0.55  | 0.54±0.48  | 0.44±0.39  | 0.95±0.85  |
| $\beta$ -Copaene            | 1432 | 0.22±0.19                                         | 0.26±0.09  | -          | 0.17±0.15  | 0.84±0.14  |
| Humulene                    | 1446 | -                                                 | 0.32±0.12  | -          | -          | 0.12±0.02  |
| $\alpha$ -Muurokene         | 1495 | 1.13±0.27                                         | 0.33±0.14  | -          | -          | -          |
| $\gamma$ -Cadinene          | 1509 | 0.63±0.01                                         | 0.44±0.08  | -          | -          | -          |
| Cubebol                     | 1509 | 0.27±0.08                                         | 0.05±0.03  | 0.12±0.02  | 0.04±0.03  | 0.04±0.00  |
| $\delta$ -Cadinene          | 1521 | 0.93±0.14                                         | 0.80±0.27  | 0.04±0.04  | 0.04±0.04  | 0.10±0.02  |
| Caryophyllene<br>oxide      | 1582 | 1.71±0.30                                         | 0.16±0.15  | -          | -          | -          |
| Total                       |      | 97.5±0.68                                         | 98.6±0.43  | 98.87±0.51 | 99.44±0.42 | 98.68±1.27 |

Note: Values represent averages of 3 determinations; retention index (RI) relative to standard mixture of n-alkanes on HP-5MS column.



**Table S2.** Length distribution of predicted proteins of *Origanum vulgare* 'Hot & Spicy'.

| Protein length span | Numbers | Percent (%) |
|---------------------|---------|-------------|
| 0~100               | 4243    | 10.51       |
| 100~200             | 8028    | 19.89       |
| 200~300             | 7294    | 18.07       |
| 300~400             | 6444    | 15.96       |
| 400~500             | 5017    | 12.43       |
| 500~600             | 3478    | 8.62        |
| 600~700             | 2094    | 5.19        |
| 700~800             | 1313    | 3.25        |
| 800~900             | 938     | 2.32        |
| 900~1000            | 583     | 1.44        |
| 1000~1100           | 324     | 0.8         |
| 1100~1200           | 213     | 0.53        |
| 1200~1300           | 125     | 0.31        |
| 1300~1400           | 74      | 0.18        |
| 1400~1500           | 56      | 0.14        |
| 1500~1600           | 33      | 0.08        |
| 1600~1700           | 36      | 0.09        |
| 1700~1800           | 22      | 0.05        |
| 1800~1900           | 13      | 0.03        |
| 1900~2000           | 12      | 0.03        |
| 2000~2100           | 7       | 0.02        |
| 2100~2200           | 9       | 0.02        |
| 2200~2300           | 3       | 0.01        |
| 2300~2400           | 3       | 0.01        |
| 2400~2500           | 0       | 0           |
| 2500~2600           | 1       | 0           |
| 2600~2700           | 1       | 0           |
| 2700~2800           | 1       | 0           |
| 2800~2900           | 0       | 0           |
| 2900~3000           | 0       | 0           |
| 3000~3100           | 0       | 0           |

**Table S3.** Statistical table of NGS data evaluation of *Origanum vulgare* 'Hot & Spicy'.

| Samples | Read number | Base number   | GC content (%) | Q30 (%) |
|---------|-------------|---------------|----------------|---------|
| ST1     | 22,059,888  | 6,595,387,786 | 49.52          | 93.96   |
| ST2     | 22,917,197  | 6,852,978,628 | 49.57          | 94.14   |
| ST3     | 22,148,162  | 6,622,477,418 | 49.14          | 93.07   |
| LE1     | 22,461,638  | 6,726,138,800 | 49.63          | 93.89   |
| LE2     | 21,644,784  | 6,478,706,764 | 49.45          | 93.09   |
| LE3     | 22,104,584  | 6,609,676,930 | 49.93          | 93.54   |
| BR1     | 21,804,366  | 6,525,817,980 | 49.28          | 93.82   |
| BR2     | 22,183,732  | 6,632,682,292 | 49.43          | 93.77   |
| BR3     | 21,531,867  | 6,435,083,368 | 49.81          | 93.51   |
| SE1     | 25,476,878  | 7,629,805,698 | 48.33          | 93.47   |
| SE2     | 22,483,143  | 6,730,521,762 | 49.48          | 94.08   |
| SE3     | 22,278,039  | 6,660,271,094 | 49.01          | 94.20   |
| PE1     | 22,008,438  | 6,586,780,886 | 49.92          | 93.46   |
| PE2     | 21,431,964  | 6,413,527,672 | 50.08          | 93.26   |
| PE3     | 22,338,367  | 6,685,089,802 | 49.93          | 93.31   |

**Table S4.** Statistical results of comparisons between NGS-based data and SMRT-based non-redundant transcript data of *Origanum vulgare* 'Hot & Spicy'.

| Sample name | Total reads | Uniquely mapped reads (%) | Percent of reads mapped to multiple loci (%) | Percent of reads mapped to too many loci (%) |
|-------------|-------------|---------------------------|----------------------------------------------|----------------------------------------------|
| ST1         | 22,059,888  | 35.12                     | 45.03                                        | 2.75                                         |
| ST2         | 22,917,197  | 35.27                     | 45.35                                        | 2.65                                         |
| ST3         | 22,148,162  | 35.13                     | 44.36                                        | 2.63                                         |
| LE1         | 22,461,638  | 34.88                     | 46.13                                        | 3.99                                         |
| LE2         | 21,644,784  | 35.27                     | 45.29                                        | 4.00                                         |
| LE3         | 22,104,584  | 34.93                     | 45.59                                        | 4.15                                         |
| BR1         | 21,804,366  | 34.02                     | 45.08                                        | 3.96                                         |
| BR2         | 22,183,732  | 32.68                     | 46.45                                        | 5.24                                         |
| BR3         | 21,531,867  | 32.34                     | 47.39                                        | 5.12                                         |
| SE1         | 25,476,878  | 36.75                     | 43.06                                        | 2.31                                         |
| SE2         | 22,483,143  | 34.92                     | 43.96                                        | 3.30                                         |
| SE3         | 22,278,039  | 34.32                     | 43.87                                        | 3.02                                         |
| PE1         | 22,008,438  | 31.99                     | 51.39                                        | 2.46                                         |
| PE2         | 21,431,964  | 32.47                     | 51.34                                        | 2.13                                         |
| PE3         | 22,338,367  | 32.26                     | 51.00                                        | 2.27                                         |

**Table S5.** Statistical table of the number of DEGs.

| Compare pairs | Number of DEGs | Number of up-regulated DEGs | Number of down-regulated DEGs |
|---------------|----------------|-----------------------------|-------------------------------|
| ST vs BR      | 10,051         | 4,623                       | 5,428                         |
| ST vs LE      | 10,951         | 5,758                       | 5,193                         |
| ST vs PE      | 14,762         | 7,596                       | 7,166                         |
| ST vs SE      | 10,378         | 4,940                       | 5,438                         |
| LE vs BR      | 4,662          | 1,712                       | 2,950                         |
| LE vs PE      | 14,930         | 7,339                       | 7,591                         |
| LE vs SE      | 9,455          | 4,759                       | 4,696                         |
| BR vs PE      | 10,572         | 5,982                       | 4,590                         |
| BR vs SE      | 1,718          | 1,437                       | 281                           |
| SE vs PE      | 9,091          | 4,845                       | 4,246                         |

**Table S6.** Overview of co-expression network genes in orangered4, plum1, ivory, lightcyan, darkgrey and skyblue3 modules of *Origanum vulgare* ‘Hot & Spicy’ associated with carvacrol and PGT.

| Correlation                 | Network module | Gene ID             | Gene abbreviation |
|-----------------------------|----------------|---------------------|-------------------|
| positive with carvacrol/PGT | orangered4     | A_transcript_53821  | PDR               |
| positive with carvacrol/PGT | orangered4     | A_transcript_46736  | GPPS              |
| positive with carvacrol/PGT | orangered4     | A_transcript_14633  | CYP               |
| positive with carvacrol/PGT | orangered4     | A_transcript_13999  | CYP               |
| positive with carvacrol/PGT | orangered4     | A_transcript_11562  | TPS               |
| positive with carvacrol/PGT | orangered4     | A_transcript_7950   | TPS               |
| positive with carvacrol/PGT | plum1          | A_transcript_18388  | bHLH              |
| positive with carvacrol/PGT | plum1          | A_transcript_27329  | ZIP               |
| positive with carvacrol/PGT | plum1          | A_transcript_31274  | AP2/ERF-ERF       |
| positive with carvacrol/PGT | plum1          | A_transcript_33197  | bHLH              |
| positive with carvacrol/PGT | plum1          | A_transcript_42934  | HDS               |
| positive with carvacrol/PGT | plum1          | A_transcript_60623  | ZIP               |
| positive with carvacrol/PGT | plum1          | A_transcript_72390  | MYB               |
| positive with carvacrol/PGT | plum1          | A_transcript_82926  | bHLH              |
| positive with carvacrol/PGT | plum1          | A_transcript_98964  | NAC               |
| positive with carvacrol     | ivory          | A_transcript_96514  | AP2/ERF-ERF       |
| positive with carvacrol     | ivory          | A_transcript_84077  | bHLH              |
| positive with PGT           | lightcyan      | A_transcript_10757  | ZIP               |
| positive with PGT           | lightcyan      | A_transcript_11337  | ZIP               |
| positive with PGT           | lightcyan      | A_transcript_12097  | ZIP               |
| positive with PGT           | lightcyan      | A_transcript_28681  | MYB               |
| positive with PGT           | lightcyan      | A_transcript_30217  | ZIP               |
| positive with PGT           | lightcyan      | A_transcript_42676  | WRKY              |
| positive with PGT           | lightcyan      | A_transcript_92121  | MYB               |
| negative with PGT           | darkgrey       | A_transcript_69853  | FPPS              |
| negative with PGT           | darkgrey       | A_transcript_67597  | bHLH              |
| negative with PGT           | darkgrey       | A_transcript_57037  | HMGS              |
| negative with PGT           | darkgrey       | A_transcript_48335  | ZIP               |
| negative with PGT           | darkgrey       | A_transcript_42863  | bHLH              |
| negative with PGT           | darkgrey       | A_transcript_39489  | bHLH              |
| negative with PGT           | darkgrey       | A_transcript_20788  | WRKY              |
| negative with PGT           | darkgrey       | A_transcript_14980  | bHLH              |
| negative with PGT           | darkgrey       | A_transcript_100633 | AP2/ERF-ERF       |
| negative with PGT           | darkgrey       | A_transcript_75143  | bHLH              |
| negative with PGT           | skyblue3       | A_transcript_20946  | MYB               |
| negative with PGT           | skyblue3       | A_transcript_25591  | WRKY              |
| negative with PGT           | skyblue3       | A_transcript_30141  | bHLH              |
| negative with PGT           | skyblue3       | A_transcript_32386  | ZIP               |
| negative with PGT           | skyblue3       | A_transcript_36591  | bHLH              |
| negative with PGT           | skyblue3       | A_transcript_4386   | bHLH              |

---

|                   |          |                    |      |
|-------------------|----------|--------------------|------|
| negative with PGT | skyblue3 | A_transcript_58297 | WRKY |
| negative with PGT | skyblue3 | A_transcript_7074  | bHLH |
| negative with PGT | skyblue3 | A_transcript_7117  | bHLH |
| negative with PGT | skyblue3 | A_transcript_92819 | WRKY |

---
